# Supplementary material
Source: PubMed Central journal article supplement (PMC1871834)
Supplement: pnas_0610481104_3.pdf [file pnas_0610481104_3.pdf]

## Reaction supernatants

### Stage 1 (Ub):

TBP, TFIIB, Pol II,  
TFIIF, TFIIH, BRCA1,  
E1 and E2.

TFIIE: - - - - + + + +  
Ub: - + - + - + - +

71

55

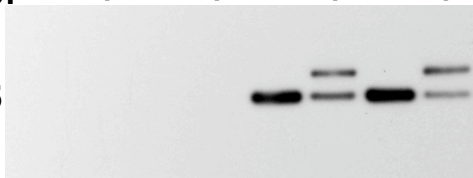

p56E

### Stage 2 (No Ub):

Template and supe  
from stage 1.

TFIIE/H: - - + + - - + +

71

55

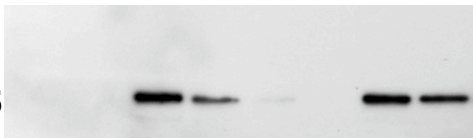

p56E

1 2 3 4 5 6 7 8
