# Supplementary material
Source: PubMed Central journal article supplement (PMC1871834)
Supplement: pnas_0610481104_5.pdf [file pnas_0610481104_5.pdf]

|                | <b>Array</b> |   | <b>Taqman</b> |   |
|----------------|--------------|---|---------------|---|
| <b>AREG</b>    | 5.0 fold     | ↓ | 3.1 fold      | ↓ |
| <b>GADD45a</b> | 3.4 fold     | ↓ | 3.0 fold      | ↓ |
| <b>ATF3</b>    | 6.9 fold     | ↓ | 1.8 fold      | ↓ |
| <b>SPUVE</b>   | 8.5 fold     | ↓ | 3.4 fold      | ↓ |
| <b>TDRD7</b>   | 15.8 fold    | ↓ | 2.5 fold      | ↓ |
| <b>EGR1</b>    | 3.1 fold     | ↓ | 7.2 fold      | ↓ |
| <b>LIV-1</b>   | 11.0 fold    | ↑ | 3.8 fold      | ↑ |
