# Supplementary material
Source: PubMed Central journal article supplement (PMC1871834)

|                   |   |   |   |   |   |   |   |
|-------------------|---|---|---|---|---|---|---|
| <b>E1:</b>        | - | - | + | - | + | + | + |
| <b>E2:</b>        | - | - | + | + | - | + | + |
| <b>BRCA:</b>      | - | + | + | + | + | - | + |
| <b>Ubiquitin:</b> | - | - | + | + | + | + | - |

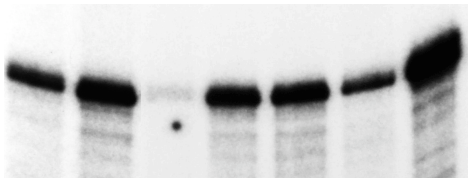

**1**      **2**      **3**      **4**      **5**      **6**      **7**

Supplement: pnas_0610481104_1.pdf [file pnas_0610481104_1.pdf]

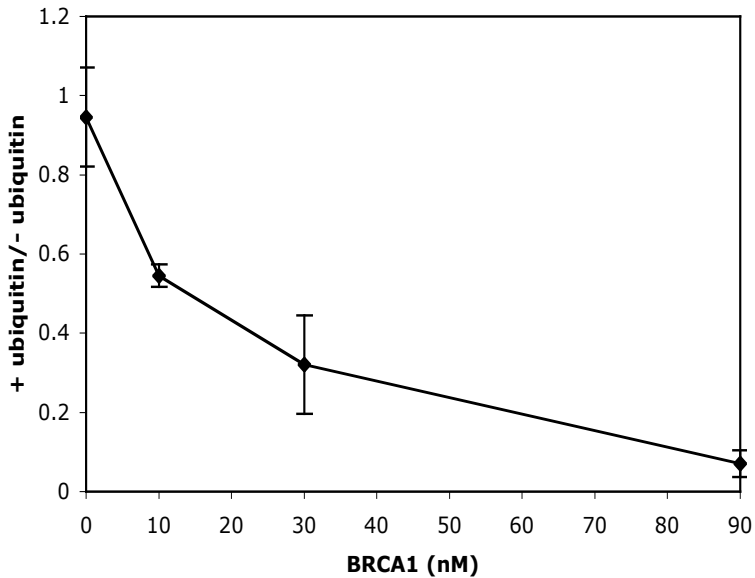

Supplement: pnas_0610481104_2.pdf [file pnas_0610481104_2.pdf]

**Stage 1**

**Stage 2**

**8**

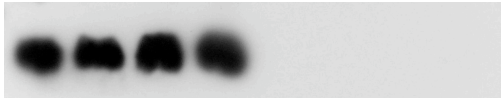

**ubiquitin**

**2**

**4**

**6**

**8**

**2**

**4**

**6**

**8**

Supplement: pnas_0610481104_4.pdf [file pnas_0610481104_4.pdf]
